# Supplementary material
Source: MDPI journal article supplement (https://www.mdpi.com/2073-445X/11/9/1445)
Supplement: s1 [file s1]

**Table S1** Carbon emission coefficients of each item of carbon sources

| Item                                                     | Type code                         | Coefficient | Source |
|----------------------------------------------------------|-----------------------------------|-------------|--------|
| Crop seeding (kg/hm <sup>2</sup> )                       | f <sub>1</sub>                    | 16.47       | [1]    |
| Agricultural machinery activity (kg/kW)                  | f <sub>2</sub>                    | 0.18        | [1]    |
| Irrigation process (kg/hm <sup>2</sup> )                 | f <sub>3</sub>                    | 266.48      | [1]    |
| Fertilizer application (kg/t)                            | f <sub>4</sub>                    | 857.54      | [1]    |
| Pig respiration (kg/head/a)                              | f <sub>5</sub>                    | 83.5        | [2]    |
| Cattle respiration (kg/head/a)                           | f <sub>6</sub>                    | 797.0       | [2]    |
| Sheep respiration (kg/head/a)                            | f <sub>7</sub>                    | 237.25      | [3]    |
| Rice respiration (g/m <sup>2</sup> )                     | f <sub>8</sub>                    | 16.07       | [4]    |
| Bus operation (kg/100 km)                                | f <sub>9</sub>                    | 88.1        | [5]    |
| Taxi operation (kg/100 km)                               | f <sub>10</sub>                   | 28.3        | [5]    |
| Private car operation (kg/100 km)                        | f <sub>11</sub>                   | 22.3        | [5]    |
| Motorcycle operation (kg/100 km)                         | f <sub>12</sub>                   | 6.7         | [5]    |
| Road passenger and freight (kg/tkm)                      | f <sub>13</sub>                   | 0.0556      | [5]    |
| Rail passenger and freight (kg/tkm)                      | f <sub>14</sub>                   | 0.0217      | [5]    |
| Urban/rural living electricity consumption (kg/kW·h)     | f <sub>15</sub> / f <sub>17</sub> | 0.1229      | [3]    |
| Urban/rural permanent population breathing (kg/person/a) | f <sub>16</sub> / f <sub>18</sub> | 79          | [2]    |
| Raw coal (kg/t)                                          | d <sub>1</sub>                    | 0.7559      | [2,6]  |
| Coal washed (kg/t)                                       | d <sub>2</sub>                    | 0.7559      | [2,6]  |
| Coke (kg/t)                                              | d <sub>3</sub>                    | 0.8550      | [2,6]  |
| Coke oven gas (kg/m <sup>3</sup> )                       | d <sub>4</sub>                    | 0.3548      | [2,6]  |
| Natural gas (kg/m <sup>3</sup> )                         | d <sub>5</sub>                    | 0.4483      | [2,6]  |
| Gasoline (kg/t)                                          | d <sub>6</sub>                    | 0.5538      | [2,6]  |
| Kerosene (kg/t)                                          | d <sub>7</sub>                    | 0.5714      | [2,6]  |
| Diesel oil (kg/t)                                        | d <sub>8</sub>                    | 0.5921      | [2,6]  |
| Combustion oil (kg/t)                                    | d <sub>9</sub>                    | 0.6185      | [2,6]  |
| Liquefied petroleum gas (kg/t)                           | d <sub>10</sub>                   | 0.5042      | [2,6]  |
| Other petroleum products (kg/t)                          | d <sub>11</sub>                   | 0.5857      | [2,6]  |
| Conversion coefficient of CO <sub>2</sub> and carbon     |                                   | 0.27        | [5]    |
| Conversion coefficient of CH <sub>4</sub> and carbon     |                                   | 0.75        | [5]    |

**Table S2** Carbon sequestration coefficients of each secondary land type

| PLE space types               | Secondary classification of land use system | Carbon sequestration coefficient | Source |
|-------------------------------|---------------------------------------------|----------------------------------|--------|
| Agricultural production space | -                                           | 0.0007                           | [2]    |
| Grassland ecological space    | High cover grassland                        | 0.0138                           | [7]    |
|                               | Medium cover grassland                      | 0.0046                           | [7]    |
|                               | Low cover grassland                         | 0.0021                           | [8]    |
| Forest ecological space       | Wooded land                                 | 0.0657                           | [5]    |
|                               | Shrubland                                   | 0.0161                           | [7]    |
|                               | Open woodland                               | 0.0581                           | [8]    |
|                               | Other woodland                              | 0.0103                           | [7]    |
| Water ecological space        | River                                       | 0.025                            | [9]    |
|                               | Lakes                                       | 0.039                            | [10]   |

**Table S3** Direct carbon flow matrix F from 2000 to 2005 /(t C/a)

| 2000 | 2005     |           |           |          |         |         |          |        |
|------|----------|-----------|-----------|----------|---------|---------|----------|--------|
|      | CU       | IN        | UR        | RU       | G       | F       | W        | B      |
| CU   | 0.00     | 952083.02 | 122550.88 | 75505.25 | 39.67   | 793.83  | 11559.45 | 2.05   |
| IN   | 12348.25 | 0.00      | 17906.86  | 9671.75  | 2020.20 | 6969.39 | 3938.03  | 542.06 |
| UR   | 5965.95  | 4425.36   | 0.00      | 528.75   | 8.97    | 388.40  | 844.13   | 4.91   |
| RU   | 21257.65 | 18451.26  | 620.59    | 0.00     | 34.22   | 992.21  | 2921.42  | 15.15  |
| G    | 60.74    | 2084.67   | 16.77     | 81.03    | 0.00    | 1.98    | 11.84    | 0.12   |
| F    | 301.40   | 6130.62   | 443.44    | 964.17   | 1.72    | 0.00    | 13.97    | 4.23   |
| W    | 4763.39  | 20271.13  | 3601.07   | 4308.14  | 19.99   | 15.17   | 0.00     | 3.61   |
| B    | 2.84     | 407.32    | 4.16      | 13.73    | 0.19    | 3.58    | 3.98     | 0.00   |

Note: <sup>a</sup> Red represents negative carbon flow and green represents positive carbon flow. <sup>b</sup> IN, industrial production space; UR, urban living space; RU, rural living space; G, grassland ecological space; F, forest ecological space; W, water ecological space; CU, agricultural production space; B, other ecological space.

**Table S4** Direct carbon flow matrix F from 2005 to 2010 /(t C/a)

| 2005 | 2010     |            |            |           |         |          |          |        |
|------|----------|------------|------------|-----------|---------|----------|----------|--------|
|      | CU       | IN         | UR         | RU        | G       | F        | W        | B      |
| CU   | 0.00     | 1933428.59 | 307311.39  | 234516.55 | 109.16  | 957.06   | 25119.43 | 302.67 |
| IN   | 43895.78 | 0.00       | 1579931.93 | 118875.50 | 2272.44 | 35321.88 | 43248.92 | 193.68 |
| UR   | 7630.17  | 11265.92   | 0.00       | 7140.20   | 15.27   | 359.18   | 1124.91  | 15.21  |
| RU   | 33163.30 | 77089.04   | 32533.74   | 0.00      | 75.62   | 1373.51  | 8273.32  | 103.09 |
| G    | 99.86    | 128810.38  | 291.06     | 317.33    | 0.00    | 5.20     | 25.20    | 7.76   |
| F    | 853.56   | 22014.05   | 4589.12    | 4129.36   | 2.93    | 0.00     | 68.02    | 4.02   |
| W    | 5342.68  | 449049.49  | 32156.39   | 8761.41   | 24.70   | 23.39    | 0.00     | 5.83   |
| B    | 2.28     | 2702.49    | 47.03      | 670.79    | 0.17    | 19.77    | 12.35    | 0.00   |

Note: <sup>a</sup> Red represents negative carbon flow and green represents positive carbon flow. <sup>b</sup> IN, industrial production space; UR, urban living space; RU, rural living space; G, grassland ecological space; F, forest ecological space; W, water ecological space; CU, agricultural production space; B, other ecological space.

**Table S5** Direct carbon flow matrix F from 2010 to 2018 /(t C/a)

| 2010 | 2018      |            |           |           |           |          |          |         |
|------|-----------|------------|-----------|-----------|-----------|----------|----------|---------|
|      | CU        | IN         | UR        | RU        | G         | F        | W        | B       |
| CU   | 0         | 3294222.80 | 116480.85 | 137045.46 | 405.79    | 398.94   | 5519.42  | 41.04   |
| IN   | 161333.49 | 0          | 108592.10 | 27468.84  | 258613.64 | 17538.30 | 34525.73 | 3143.10 |
| UR   | 19130.01  | 69683.66   | 0         | 1616.22   | 172.94    | 699.01   | 4464.95  | 35.48   |
| RU   | 57648.66  | 55217.28   | 2291.59   | 0         | 123.18    | 1943.50  | 5000.49  | 32.96   |
| G    | 122.65    | 501155.69  | 199.45    | 293.49    | 0         | 2.06     | 9.16     | 0.76    |
| F    | 274.84    | 86642.69   | 846.73    | 3154.39   | 112.70    | 0        | 36.86    | 7.49    |
| W    | 9936.43   | 2930527.40 | 29191.18  | 23033.39  | 809.98    | 35.56    | 0        | 10.27   |
| B    | 54.70     | 897.68     | 2168.28   | 200.73    | 0.81      | 2.72     | 14.01    | 0       |

Note: <sup>a</sup> Red represents negative carbon flow and green represents positive carbon flow. <sup>b</sup> IN, industrial production space; UR, urban living space; RU, rural living space; G, grassland ecological space; F, forest ecological space; W, water ecological space; CU, agricultural production space; B, other ecological space.

**Table S6** Ecological relationships between PLE space types in the network from 2000 to 2005

|    | CU        | IN | UR      | RU | G           | F | W | B            |
|----|-----------|----|---------|----|-------------|---|---|--------------|
| CU |           | +  | +       | +  | -           | + | - | +            |
| IN | -         |    | -       | -  | -           | + | - | +            |
| UR | -         | -  |         | -  | -           | - | - | -            |
| RU | -         | -  | -       |    | -           | + | - | -            |
| G  | -         | +  | +       | +  |             | + | - | -            |
| F  | -         | -  | +       | -  | -           |   | + | +            |
| W  | -         | +  | +       | +  | +           | - |   | +            |
| B  | +         | -  | +       | +  | +           | - | + |              |
|    | mutualism |    | control |    | competition |   |   | exploitation |

Note: <sup>a</sup> "+"/-" indicates the positivity or negativity of the elements in the overall utility matrix U. <sup>b</sup> IN, industrial production space; UR, urban living space; RU, rural living space; G, grassland ecological space; F, forest ecological space; W, water ecological space; CU, agricultural production space; B, other ecological space.

**Table S7** Ecological relationships between PLE space types in the network from 2005 to 2010

|    | CU        | IN | UR      | RU | G           | F | W | B            |
|----|-----------|----|---------|----|-------------|---|---|--------------|
| CU |           | +  | +       | +  | -           | - | - | -            |
| IN | -         |    | +       | -  | -           | + | - | -            |
| UR | -         | -  |         | -  | +           | - | + | +            |
| RU | -         | -  | -       |    | +           | - | + | -            |
| G  | -         | +  | +       | -  |             | + | - | -            |
| F  | +         | -  | +       | +  | +           |   | + | +            |
| W  | -         | +  | +       | -  | -           | + |   | -            |
| B  | -         | +  | +       | +  | -           | + | - |              |
|    | mutualism |    | control |    | competition |   |   | exploitation |

Note: <sup>a</sup> "+"/-" indicates the positivity or negativity of the elements in the overall utility matrix U. <sup>b</sup> IN, industrial production space; UR, urban living space; RU, rural living space; G, grassland ecological space; F, forest ecological space; W, water ecological space; CU, agricultural production space; B, other ecological space.

**Table S8** Ecological relationships between PLE space types in the network from 2010 to 2018

|    | CU        | IN | UR      | RU | G           | F | W            | B |
|----|-----------|----|---------|----|-------------|---|--------------|---|
| CU |           | +  | +       | +  | -           | - | -            | + |
| IN | -         |    | -       | -  | -           | - | -            | + |
| UR | -         | -  |         | -  | +           | + | +            | - |
| RU | -         | -  | -       |    | +           | - | +            | - |
| G  | -         | +  | -       | -  |             | - | -            | + |
| F  | -         | +  | -       | +  | -           |   | -            | + |
| W  | -         | +  | -       | -  | -           | - |              | + |
| B  | +         | -  | +       | +  | +           | + | +            |   |
|    | mutualism |    | control |    | competition |   | exploitation |   |

Note: <sup>a</sup> "+"/-" indicates the positivity or negativity of the elements in the overall utility matrix U. <sup>b</sup> IN, industrial production space; UR, urban living space; RU, rural living space; G, grassland ecological space; F, forest ecological space; W, water ecological space; CU, agricultural production space; B, other ecological space.

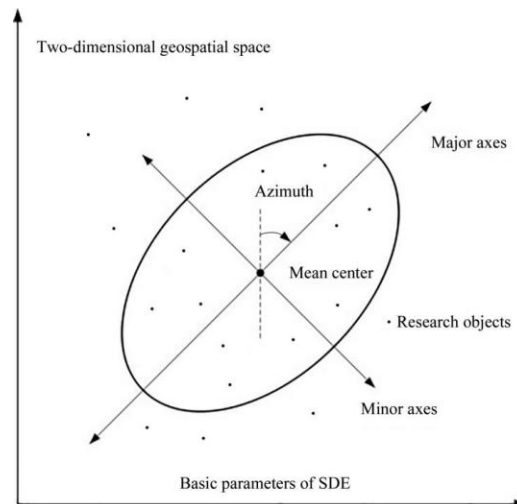**Figure S1.** Diagrammatic sketch of SDE

Explanation: The SDE method was first proposed by Lefever in 1926 to reveal the spatial distribution characteristics of geographical elements [11]. It quantitatively describes the multivariate characteristics of the spatial distribution of study objects by statistically calculating the spatial distribution ellipse with basic parameters such as center, long and short axes, and azimuth. The area of the ellipse can indicate the main distribution range of the spatial elements, the change of mean center reflects the relative position of the carbon flow in different study periods, the direction of the ellipse's long axis and its azimuthal angle (the angle produced by the long axis and the due north direction) can indicate the main spreading direction of the carbon flow, and the short axis of the ellipse indicates the degree of dispersion of the data, the shorter the short axis, the more obvious the centripetal force presented by geographical elements, and vice versa. then indicates the greater dispersion of the data distribution. The specific calculation formula is shown in the study of Du et al. [12]. The SDE spatial statistics calculation in this study is mainly based on ArcGIS platform, using an ellipse with one standard deviation for spatial statistics, which can cover about 68% of the spatial elements. On this basis, the value of carbon flows is used as the weight field, so as to show the core area of the spatial distribution of carbon flow.

## References:

1. West, T.O.; Marland, G. A Synthesis of Carbon Sequestration, Carbon Emissions, and Net Carbon Flux in Agriculture: Comparing Tillage Practices in the United States. *Agric. Ecosyst. Environ.* **2002**, *91*, 217–232, doi:10.1016/S0167-8809(01)00233-X.
2. Zhang, Y.; Xia, L.; Fath, B.D.; Yang, Z.; Yin, X.; Su, M.; Liu, G.; Li, Y. Development of a Spatially Explicit Network Model of Urban Metabolism and Analysis of the Distribution of Ecological Relationships: Case Study of Beijing, China. *J. Clean. Prod.* **2016**, *112*, 4304–4317, doi:10.1016/j.jclepro.2015.06.052.
3. Du, J.S.; Fu, J.Y.; Hao, M.M. Analyzing the carbon metabolism of "production-living-ecological" space based on ecological network utility in Zhaotong. *Journal of Natural Resources* **2021**, *36*(05), 1208–1223, doi:10.31497/zrzyxb.20210510. (in Chinese)
4. Min, J.S.; Hu, H. Calculation of greenhouse gases emission from agricultural production in China. *China population, resources and environment* **2012**, *22*(07), 21–27, doi:10.3969/j.issn.1002-2104.2012.07.004. (in Chinese)
5. Xia, C.Y.; Li, Y.; Ye, Y.M.; Shi, Z.; Liu, J.M.; Li, X.S. Analyzing urban carbon metabolism based on ecological network utility: a case study of Hangzhou City. *Acta Ecologica Sinica*, **2018**, *38*(1), 73–85, doi:10.5846/stxb201611272421. (in Chinese)
6. Shan, Y.; Guan, D.; Liu, J.; Mi, Z.; Liu, Z.; Liu, J.; Schroeder, H.; Cai, B.; Chen, Y.; Shao, S.; et al. Methodology and Applications of City Level CO<sub>2</sub> Emission Accounts in China. *J. Clean. Prod.* **2017**, *161*, 1215–1225, doi:10.1016/j.jclepro.2017.06.075.
7. Piao, S.; Fang, J.; Zhou, L.; Zhu, B.; Tan, K.; Tao, S. Changes in Vegetation Net Primary Productivity from 1982 to 1999 in China. *Glob. Biogeochem. Cycles* **2005**, *19*, 2, GB2027. doi:10.1029/2004GB002274.
8. Fang, J.; Guo, Z.; Piao, S.; Chen, A. Terrestrial Vegetation Carbon Sinks in China, 1981–2000. *Sci. China Ser. Earth Sci.* **2007**, *50*, 1341–1350, doi:10.1007/s11430-007-0049-1.
9. Meybeck, M. Riverine Transport of Atmospheric Carbon: Sources, Global Typology and Budget. In *Terrestrial Biospheric Carbon Fluxes*; Wisniewski, J., Sampson, R.N., Eds.; Springer Netherlands: Dordrecht, **1993**; pp. 443–463 ISBN 978-0-7923-2502-4.
10. Walsh, J.J. Importance of Continental Margins in the Marine Biogeochemical Cycling of Carbon and Nitrogen. *Nature* **1991**, *350*, 53–55, doi:10.1038/350053a0.
11. Lefever D.W. Measuring geographic concentration by means of the standard deviational ellipse. *The American Journal of Sociology* **1926**, *(1)*, 88–94.
12. Du, Q.; Zhou, J.; Pan, T.; Sun, Q.; Wu, M. Relationship of Carbon Emissions and Economic Growth in China's Construction Industry. *J. Clean. Prod.* **2019**, *220*, 99–109, doi:10.1016/j.jclepro.2019.02.123.
